# Supplementary material for: Construction of versatile multilayered composite nanoparticles from a customized nanogel template
Source: PubMed Central journal article supplement — Bioact Mater. 2017 Jul 1;3(1):87–96. doi: 10.1016/j.bioactmat.2017.06.003 (PMC5935661; doi:10.1016/j.bioactmat.2017.06.003), 2017-07-01
Supplement: mmc1.pdf [file mmc1.pdf]

**Title:**

Construction of Versatile Multilayered Composite Nanoparticles from a Customized Nanogel Template

**Author names and affiliations:**

*Jian Zhang,<sup>a, b, 1</sup> Jinpeng Jia,<sup>c, 1</sup> Jimin P. Kim,<sup>d</sup> Fei Yang,<sup>a, b</sup> Xing Wang,<sup>a</sup> Hong Shen,<sup>a</sup> Sijia Xu,<sup>a, b</sup> Jian Yang,<sup>d</sup> and Decheng Wu<sup>\*a, b</sup>*

<sup>a</sup> Beijing National Laboratory for Molecular Sciences, State Key Laboratory of Polymer Physics & Chemistry, Institute of Chemistry, Chinese Academy of Sciences, Beijing, China

<sup>b</sup> University of Chinese Academy of Sciences, Beijing, China

<sup>c</sup> Department of Orthopaedics, General Hospital of Chinese People's Liberation Army, Beijing, China

<sup>d</sup> Department of Biomedical Engineering, Materials Research Institute, The Huck Institutes of the Life Sciences, The Pennsylvania State University, University Park, PA, USA

\* Corresponding author at: Beijing National Laboratory for Molecular Sciences, State Key Laboratory of Polymer Physics & Chemistry, Institute of Chemistry, Chinese Academy of Sciences, Beijing 100190, China

E-mail address: [dcwu@iccas.ac.cn](mailto:dcwu@iccas.ac.cn)

Peer review under responsibility of KeAi Communications Co., Ltd.

<sup>1</sup> These two authors contributed equally to this article.

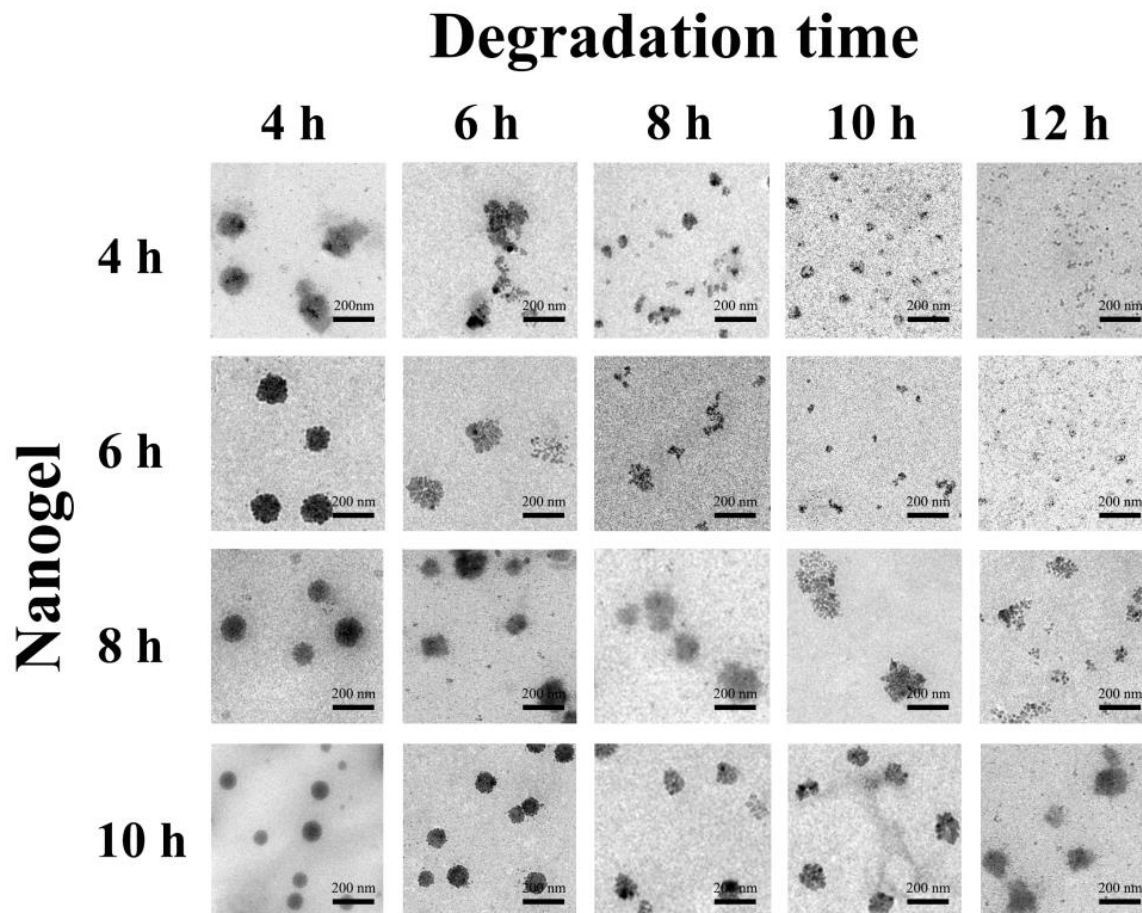

**Fig. S1.** The degradation of nanogels for 4, 6, 8, 10 and 12 h degradation times (x-axis), with gelation times of the nanogels labeled on the y-axis. Because nanogels are swollen nanosized networks that can absorb a lot of liquid in aqueous solutions, the sizes obtained from TEM and DLS results had a reasonable discrepancy.

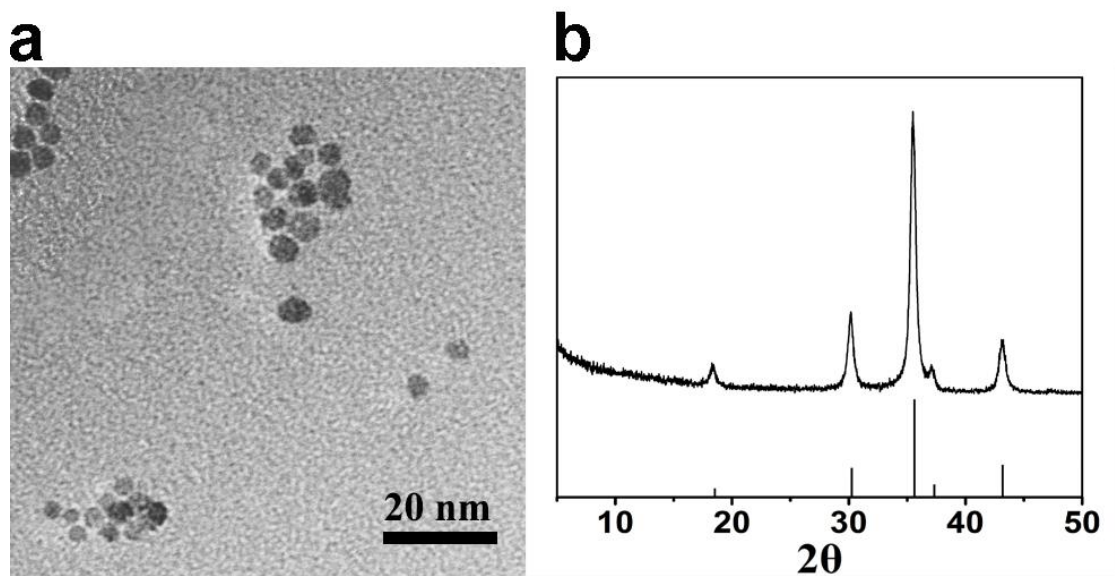

**Fig. S2.** (a) TEM image of  $\text{Fe}_3\text{O}_4$  nanoparticles and (b) XRD pattern of  $\text{Fe}_3\text{O}_4$  nanoparticles (curve) and the reference PDF for  $\text{Fe}_3\text{O}_4$  (column).

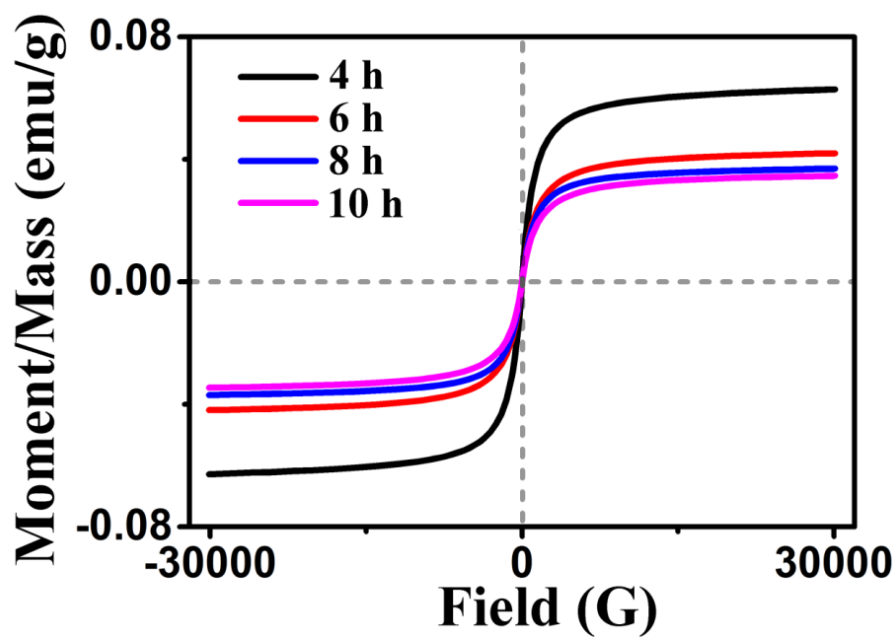

**Fig. S3.** Magnetic field curves for magnetic nanogel/ $\text{SiO}_2$  NPs. Legend: 4h = magnetic nanogel/ $\text{SiO}_2$  NPs obtained from a nanogel template with 4 h gelation time.

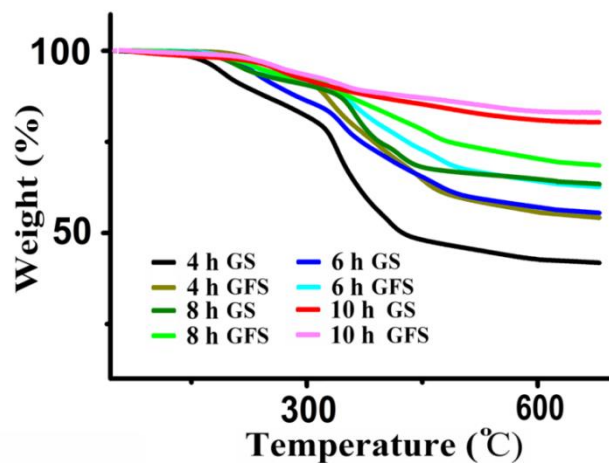

**Fig. S4.** The TGA results of thermal weight loss of nanogels in nanogel/SiO<sub>2</sub> NPs (labeled GS) and magnetic nanogel/SiO<sub>2</sub> NPs (labeled GFS). Legend: 4h = magnetic nanogel/SiO<sub>2</sub> NPs obtained from a nanogel template with 4 h gelation time.

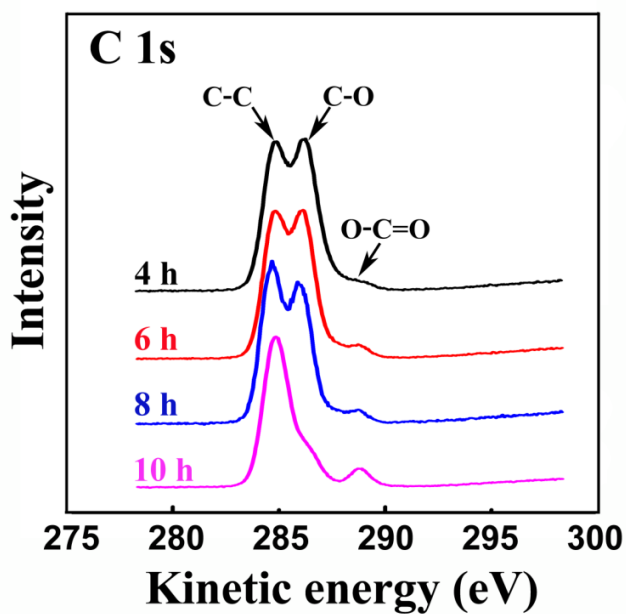

**Fig. S5.** XPS results of nanogel/SiO<sub>2</sub>/PAA NPs. Legend: 4h = nanogel/SiO<sub>2</sub>/PAA NPs obtained from a nanogel template with 4 h gelation time.

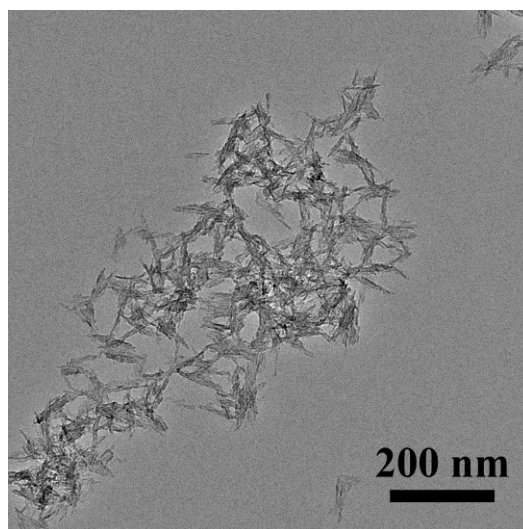

**Fig. S6.** TEM image of hydroxyapatite NPs.

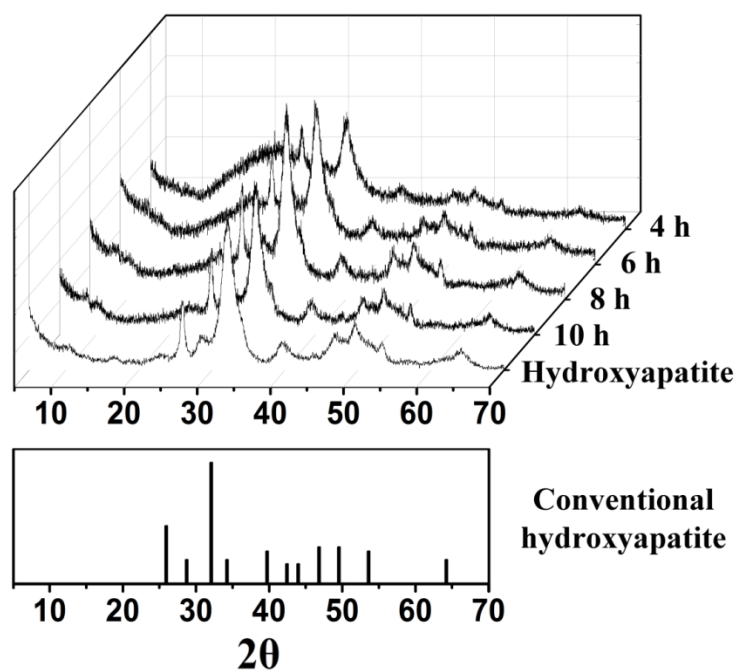

**Fig. S7.** XRD patterns of the nanogel/SiO<sub>2</sub>/PAA/HA NPs (curve) and the reference PDF for hydroxyapatite (column). Y-axis: 4h = nanogel/SiO<sub>2</sub>/PAA/HA NPs obtained from a nanogel template with 4 h gelation time.

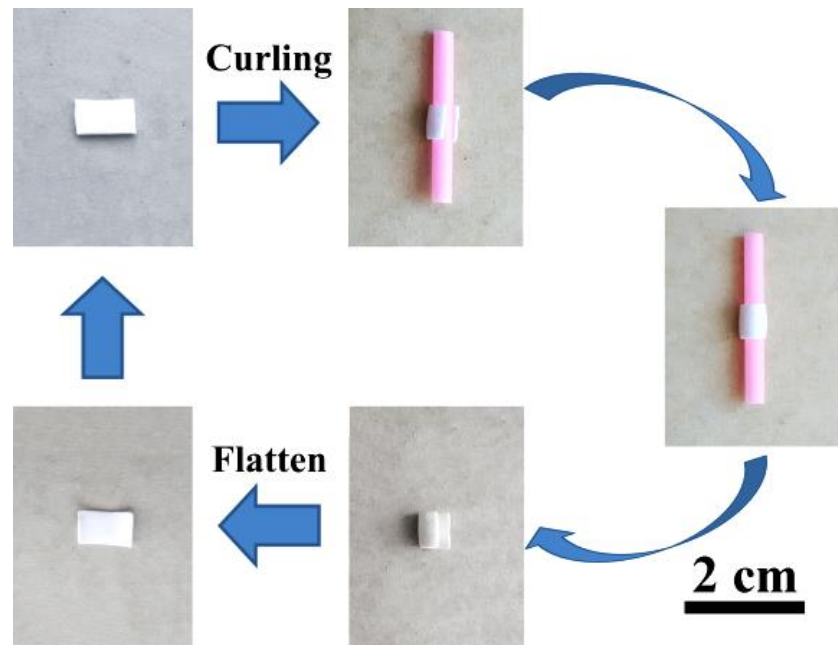

**Fig. S8.** Demonstration of biofilm flexibility with curling and spreading tests.

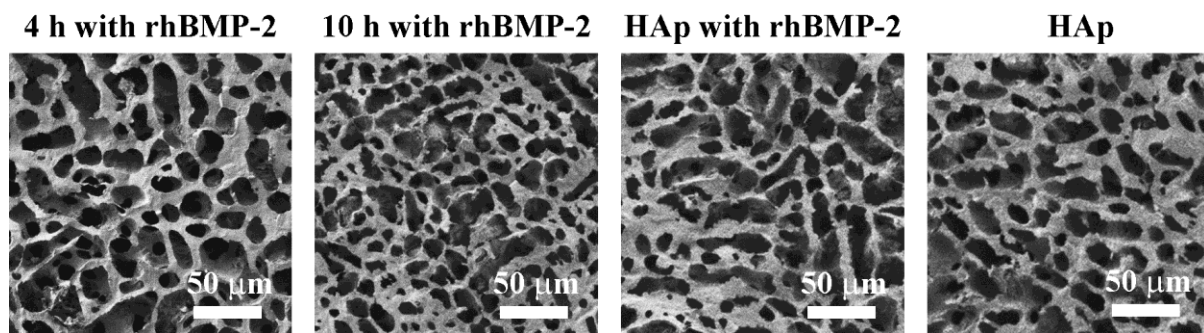

**Fig. S9.** SEM images of the films.

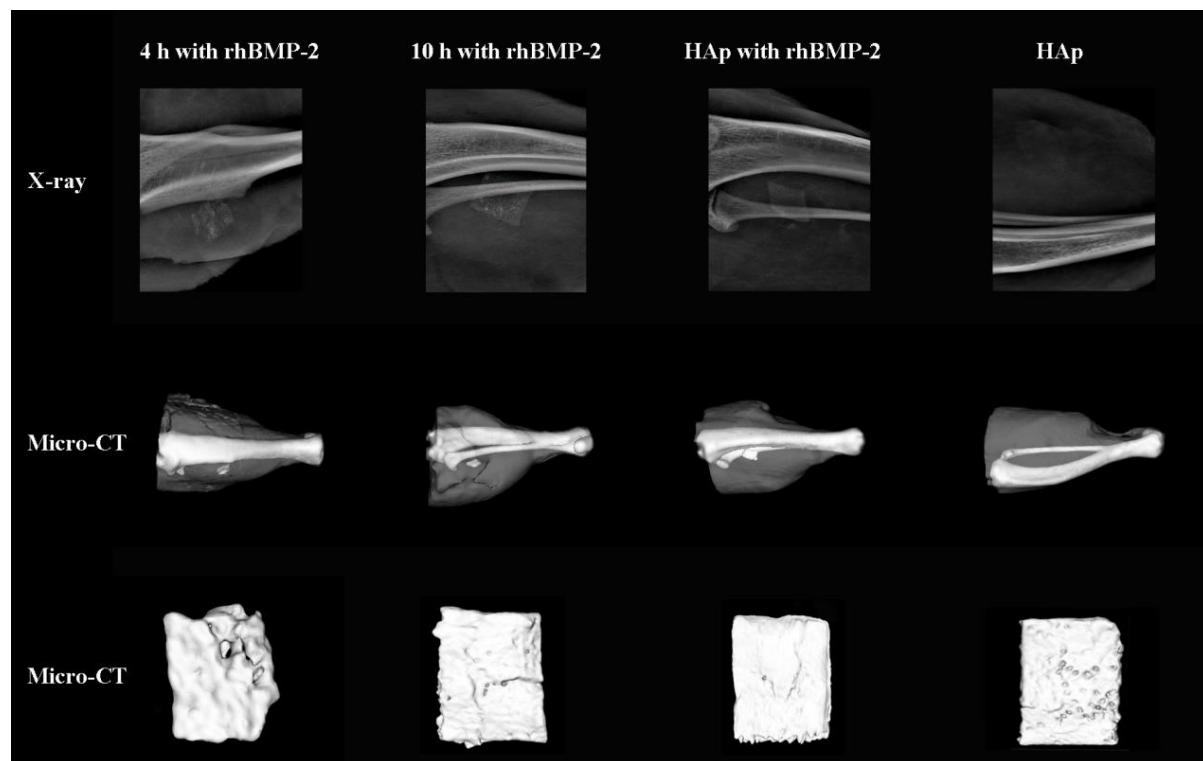

**Fig. S10.** X-ray and micro-CT characterization of ectopic bone formation after a 6-week post-implantation of (from left to right) the composite film doped with rhBMP-2 and nanogel/SiO<sub>2</sub>/PAA/HA NPs from a 4 h gelation core (left), its 10 h equivalent, PLGA/HA film loaded with rhBMP-2, and PLGA/HA film alone.
